# Supplementary material for: Dry Two-Step Self-Assembly of Stable Supported Lipid Bilayers on Silicon Substrates
Source: MDPI journal article supplement (doi:10.3390/ijms21186819), 2020-09-17
Supplement: s1 [file s1]

## Supplementary Information.

### Dry two-step self-assembly of stable supported lipid bilayers on silicon substrates.

**Marcelo A. Cisternas<sup>1,2</sup>, Francisca Palacios-Coddou<sup>1,2</sup>, Sebastian Molina<sup>1,2</sup>, Maria Jose Retamal<sup>2,3</sup>, Nancy Gomez-Vierling<sup>1,2</sup>, Nicolas Moraga<sup>1,2</sup>, Hugo Zelada<sup>1,2</sup>, Marco A. Soto-Arriaza<sup>2,3</sup>, Tomas P. Corrales<sup>4</sup> and Ulrich G. Volkmann<sup>\*1,2</sup>**

<sup>1</sup> Instituto de Fisica, Pontificia Universidad Catolica de Chile, Avda. Vicuna Mackenna 4860, Santiago 7820436, Chile

<sup>2</sup> Centro de Investigacion en Nanotecnologia y Materiales Avanzados (CIEN-UC), Pontificia Universidad Catolica de Chile, Avda. Vicuna Mackenna 4860, Santiago 7820436, Chile

<sup>3</sup> Departamento de Quimica-Fisica, Facultad de Quimica y de Farmacia, Pontificia Universidad Catolica de Chile. Avda. Vicuna Mackenna 4860, Santiago 7820436, Chile

<sup>4</sup> Departamento de Fisica, Universidad Tecnica Federico Santa Maria, Avenida Espana 1680, Valparaíso 2390123, Chile

\*Correspondence: [volkmann@uc.cl](mailto:volkmann@uc.cl); Tel.: +56-2-2354-4468

**Table S1.** Value of different rupture forces of curves that showed only one rupture.

| <b>Peak 1</b>      |             |
|--------------------|-------------|
| Position (nm)      | Height (nN) |
| -0.9               | 0.6         |
| -4.6               | 6.4         |
| -4.8               | 6.6         |
| -4.8               | 7.1         |
| -1.4               | 0.8         |
| -5.0               | 6.9         |
| -4.9               | 6.6         |
| -5.4               | 6.7         |
| -5.0               | 6.6         |
| -5.1               | 6.2         |
| -3.1               | 3.9         |
| Average            | 5.3         |
| Standard deviation | 2.4         |

**Table S2.** Value of different rupture forces of curves that showed two ruptures.

| Peak 1             |             | Peak 2        |             |
|--------------------|-------------|---------------|-------------|
| Position (nm)      | Height (nN) | Position (nm) | Height (nN) |
| -0.7               | 0.8         | -1.3          | 1.1         |
| -6.6               | 7.0         | -11.3         | 7.0         |
| -4.7               | 6.0         | -9.5          | 5.0         |
| -5.0               | 6.9         | -9.7          | 5.9         |
| -5.1               | 5.2         | -9.4          | 4.9         |
| -5.6               | 6.6         | -8.4          | 4.7         |
| -5.5               | 6.8         | -9.6          | 5.5         |
| -5.6               | 5.9         | -9.8          | 5.3         |
| -5.1               | 5.6         | -10.6         | 6.5         |
| -6.0               | 5.5         | -9.8          | 4.9         |
| -5.7               | 6.6         | -8.7          | 4.0         |
| -4.8               | 5.4         | -9.0          | 5.0         |
| -4.6               | 6.2         | -9.3          | 4.9         |
| -4.3               | 6.0         | -7.9          | 4.8         |
| -5.3               | 5.5         | -10.0         | 5.5         |
| -4.0               | 5.4         | -8.3          | 3.7         |
| -5.2               | 6.5         | -9.8          | 5.5         |
| -4.8               | 5.3         | -8.4          | 3.9         |
| -4.3               | 4.7         | -9.4          | 4.7         |
| -5.7               | 5.0         | -10.0         | 5.3         |
| -4.2               | 5.3         | -9.4          | 5.3         |
| 5.1                | 5.4         | -10.6         | 6.3         |
| -4.7               | 5.6         | -9.9          | 6.1         |
| -5.1               | 6.9         | -10.3         | 5.8         |
| -4.1               | 4.8         | -9.3          | 4.3         |
| -4.4               | 5.3         | -9.3          | 4.9         |
| -5.8               | 6.2         | -9.3          | 4.9         |
| -4.0               | 4.2         | -9.3          | 5.2         |
| -4.6               | 6.3         | -8.8          | 6.0         |
| Average            | 5.6         |               | 5.1         |
| Standard deviation | 1.2         |               | 1.1         |

**Table S3.** Value of different rupture forces of curves that showed three ruptures.

| Level 3            |                          | Level 2       |                          | Level 1       |                          |
|--------------------|--------------------------|---------------|--------------------------|---------------|--------------------------|
| Position (nm)      | Vertical Deflection (nN) | Position (nm) | Vertical Deflection (nN) | Position (nm) | Vertical Deflection (nN) |
| -5.7               | 6.9                      | -9.7          | 7.1                      | -13.6         | 6.9                      |
| -6.1               | 6.9                      | -10.0         | 6.6                      | -14.8         | 6.8                      |
| -6.3               | 7.2                      | -9.7          | 5.9                      | -13.6         | 5.7                      |
| -4.2               | 5.8                      | -8.2          | 5.1                      | -9.9          | 5.4                      |
| -3.6               | 4.4                      | -5.7          | 6.0                      | -9.9          | 4.8                      |
| -4.3               | 6.1                      | -8.8          | 5.8                      | -9.8          | 5.6                      |
| -2.1               | 2.1                      | -6.6          | 2.3                      | -9.1          | 2.7                      |
| -2.4               | 2.7                      | -4.1          | 2.5                      | -6.4          | 2.4                      |
| Average            | 5.3                      |               | 5.2                      |               | 5.0                      |
| Standard deviation | 2.0                      |               | 1.8                      |               | 1.7                      |

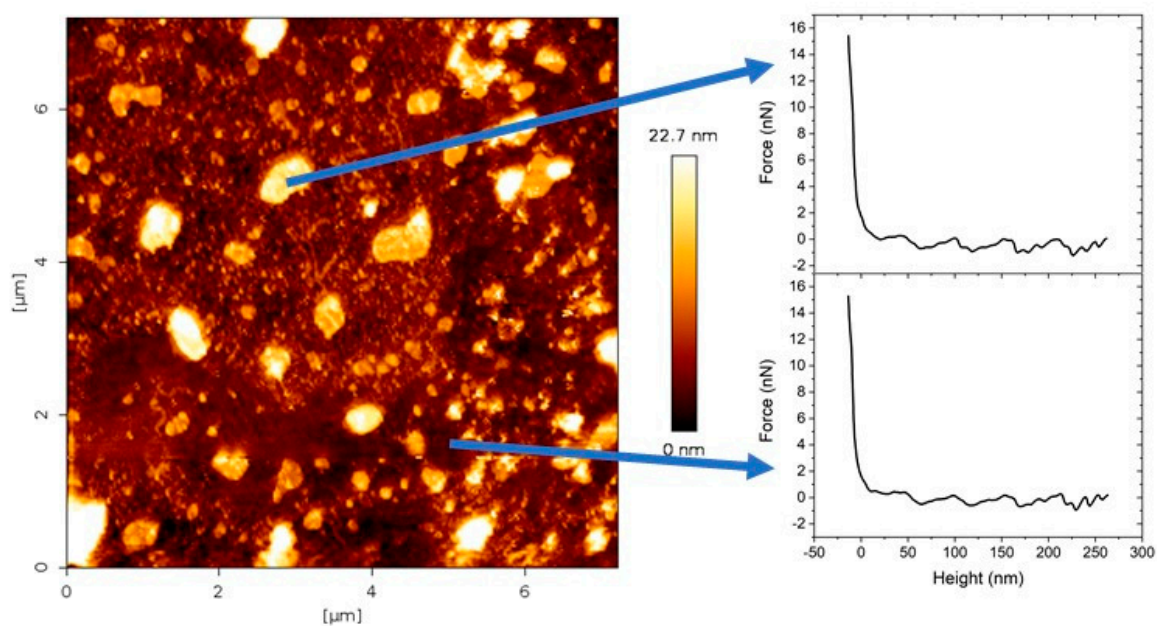

**Figure S1.** Left panel: Vapor deposited DPPC membrane in liquid conditions measured with AFM. Right panel: Force curves on a bilayer island (top panel) and bottom level (lower panel). Force curves show no evidence of a rupture.

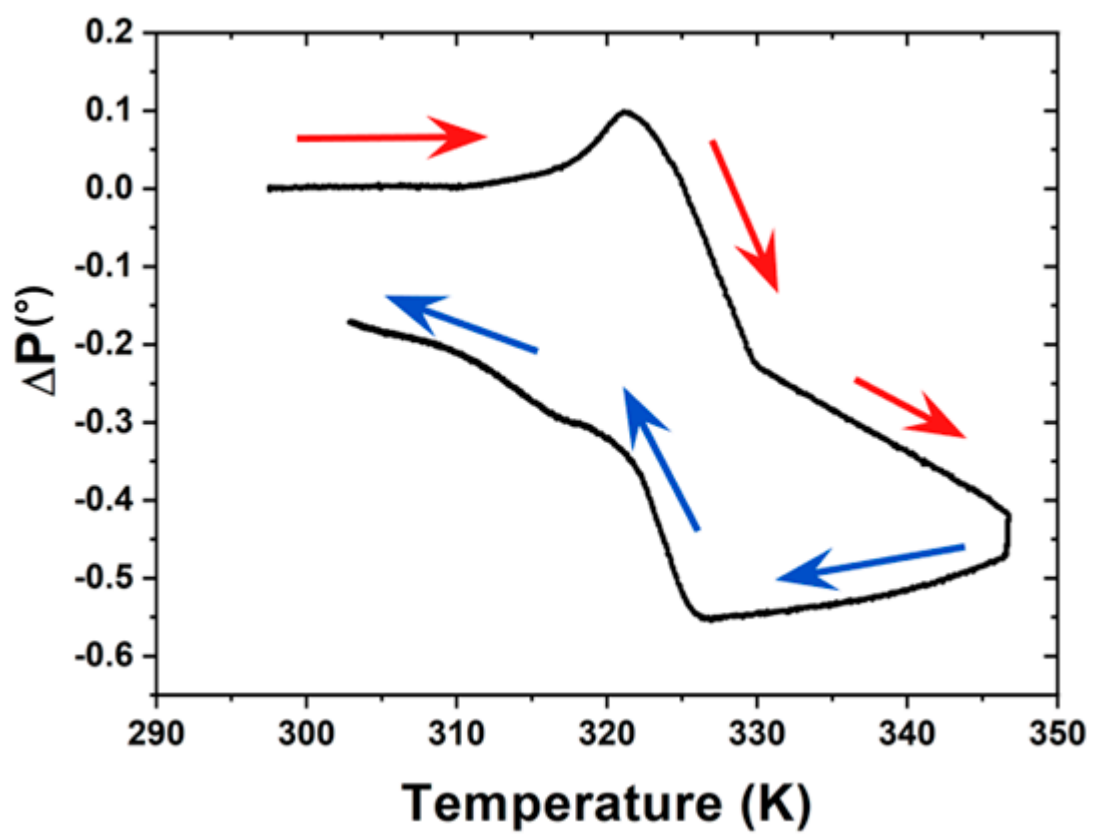

Figure S2. Temperature ramp  $\Delta P(^{\circ})$  vs. T(K) corresponding to sample NE01 ramp number 7.

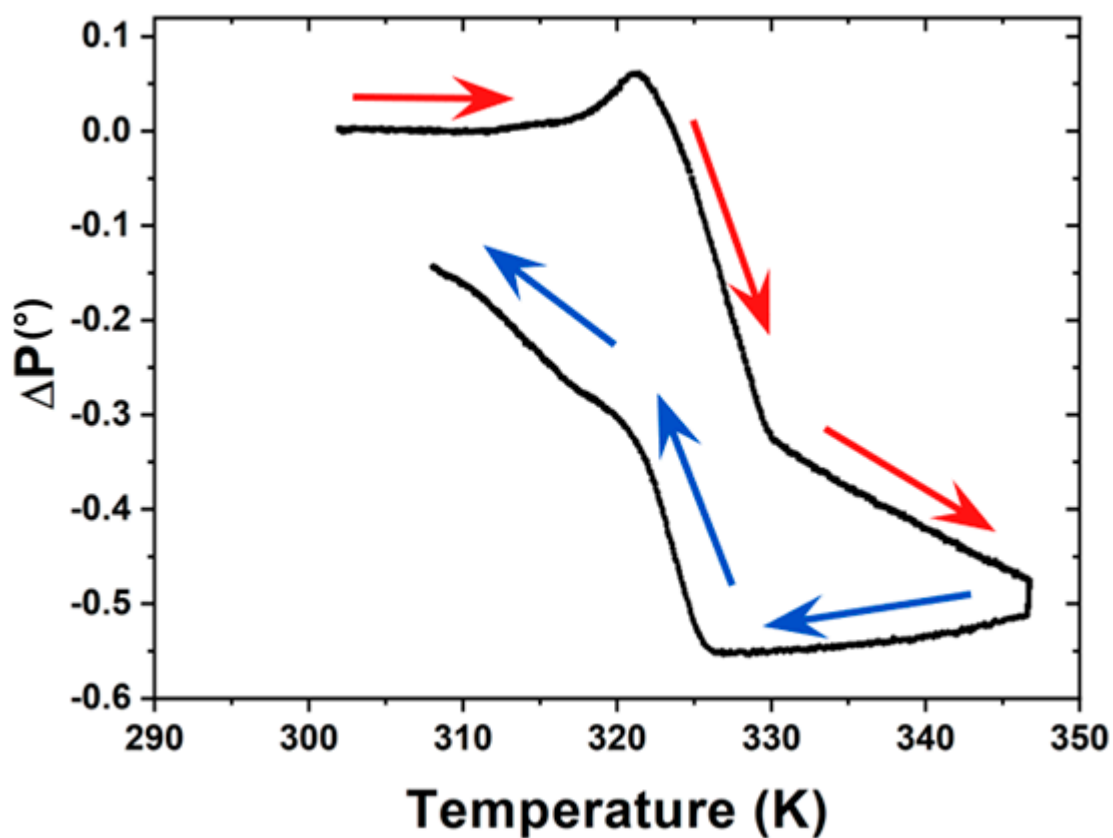

Figure S3. Temperature ramp  $\Delta P(^{\circ})$  vs. T(K) corresponding to sample NE01 ramp number 8.

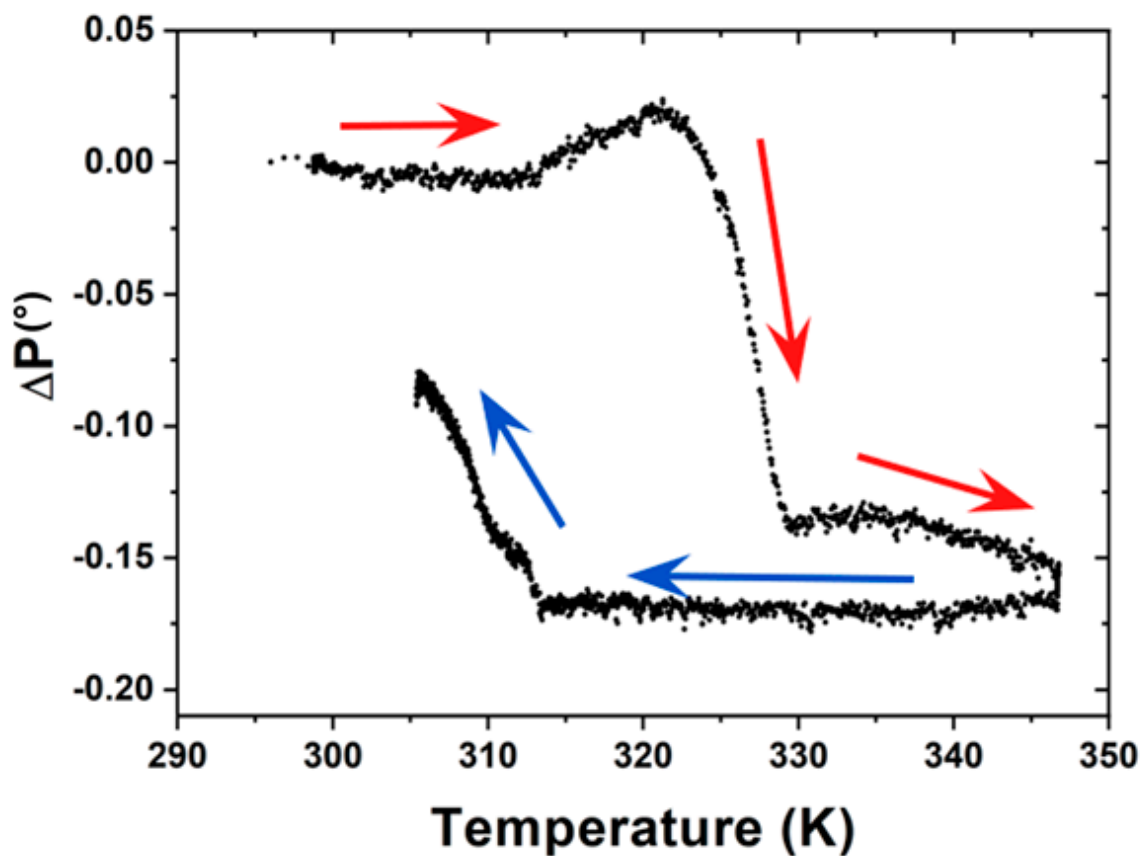

Figure S4. Temperature ramp  $\Delta P(^{\circ})$  vs. T(K) corresponding to sample H14 ramp number 3.

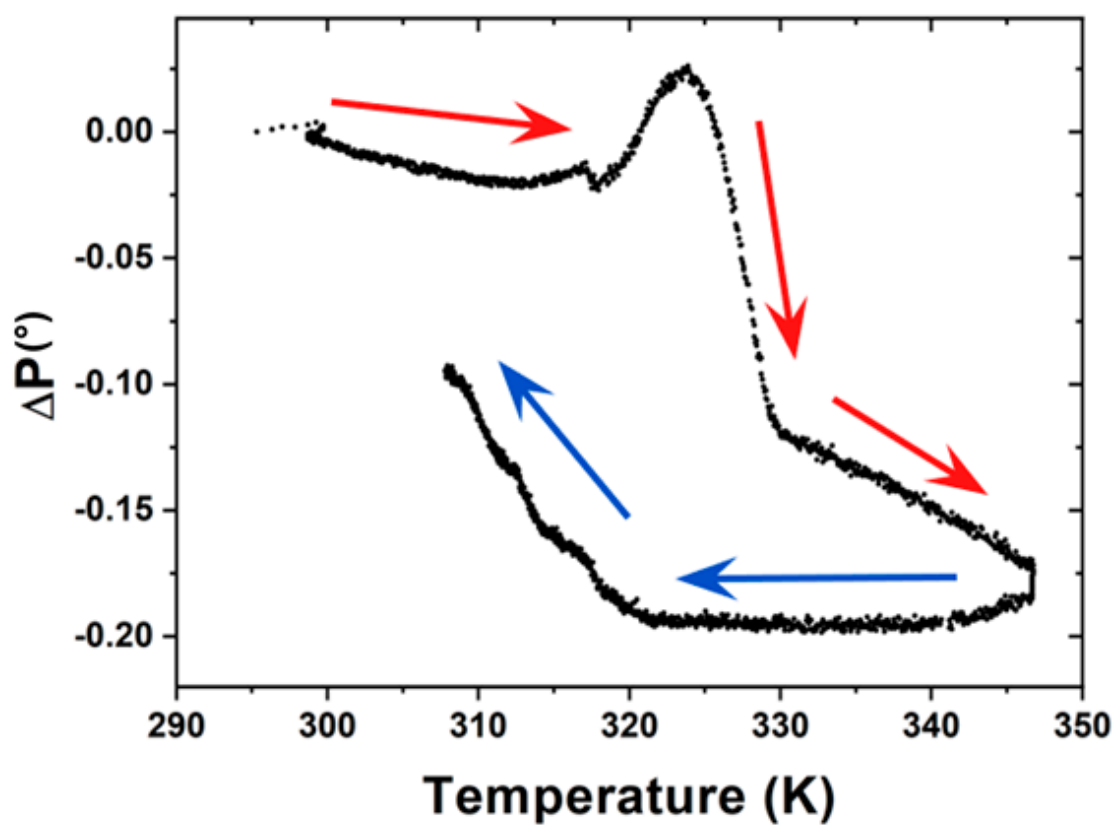

Figure S5. Temperature ramp  $\Delta P(^{\circ})$  vs. T(K) corresponding to sample H14 ramp number 6.

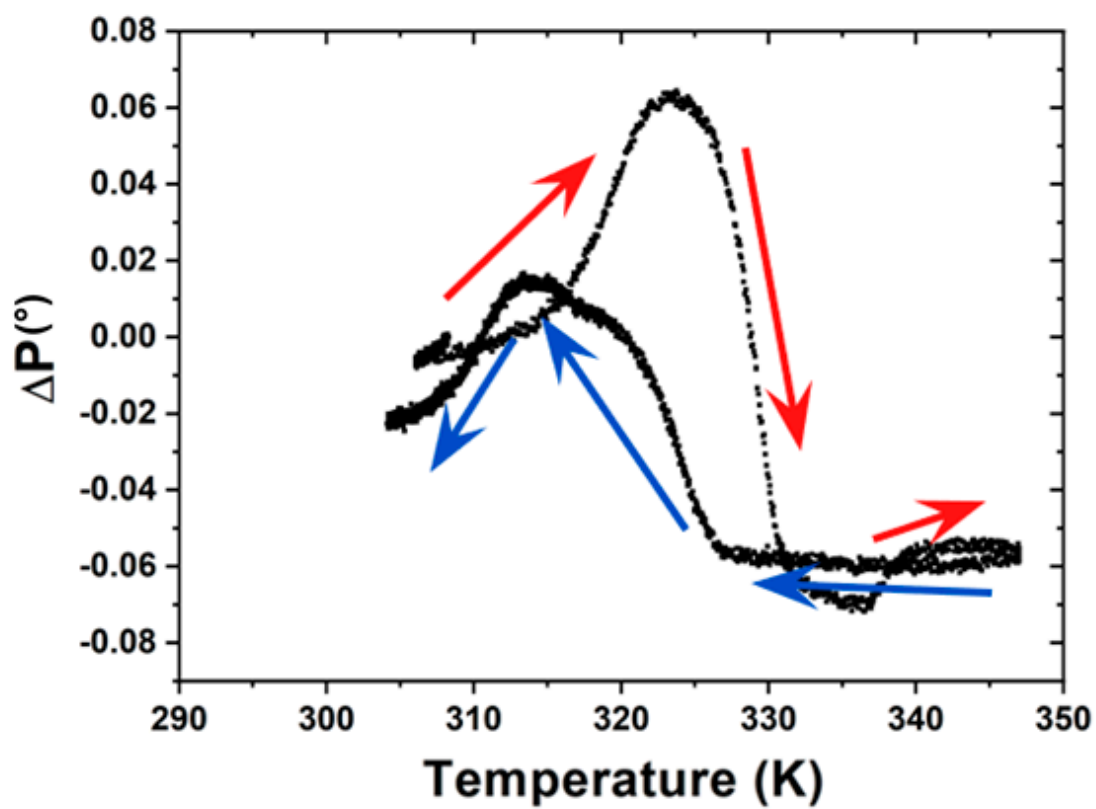

Figure S6. Temperature ramp  $\Delta P(^{\circ})$  vs. T(K) corresponding to sample H15 ramp number 5.

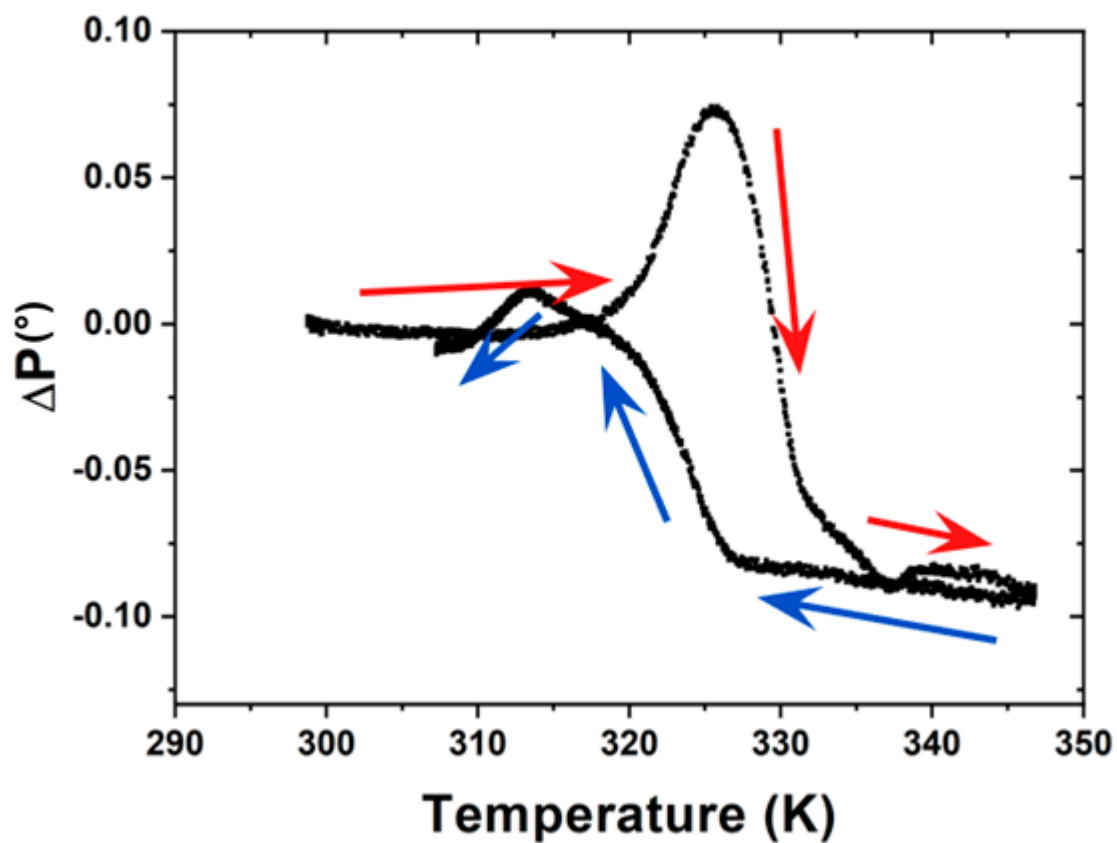

Figure S7. Temperature ramp  $\Delta P(^{\circ})$  vs. T(K) corresponding to sample H15 ramp number 6.

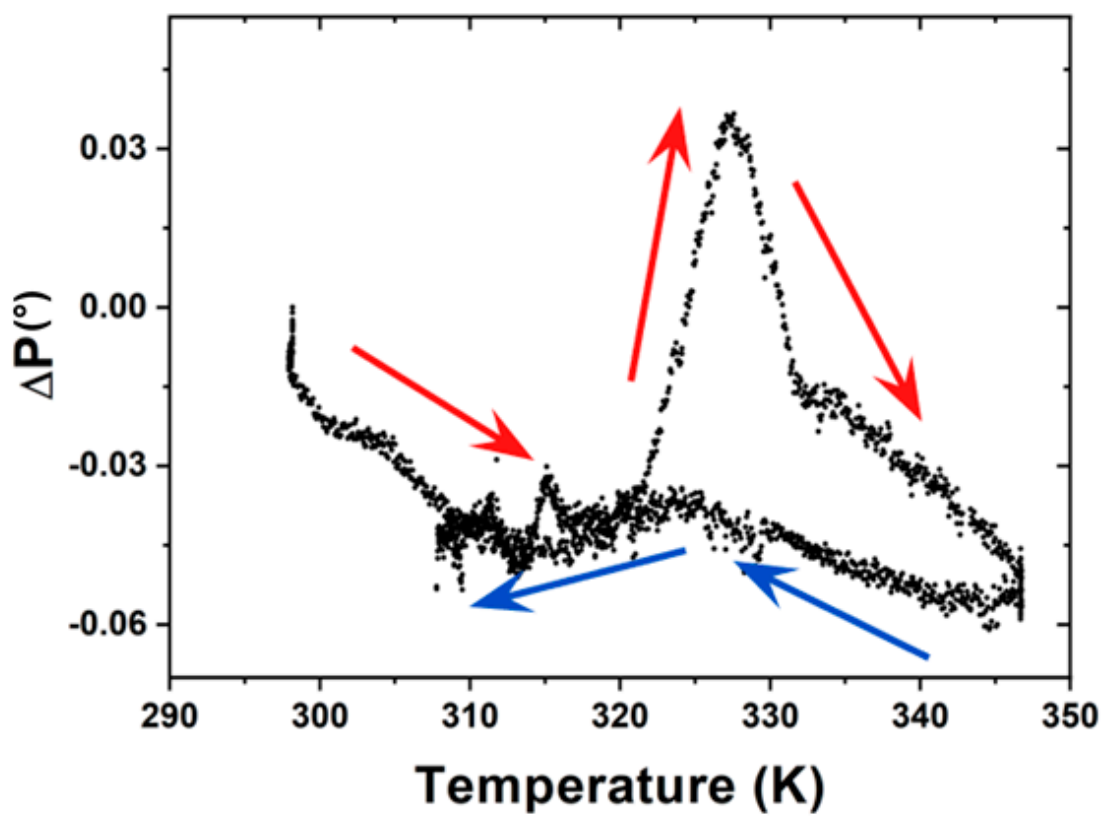

Figure S8. Temperature ramp  $\Delta P(^{\circ})$  vs. T(K) corresponding to sample H16 ramp number 6.



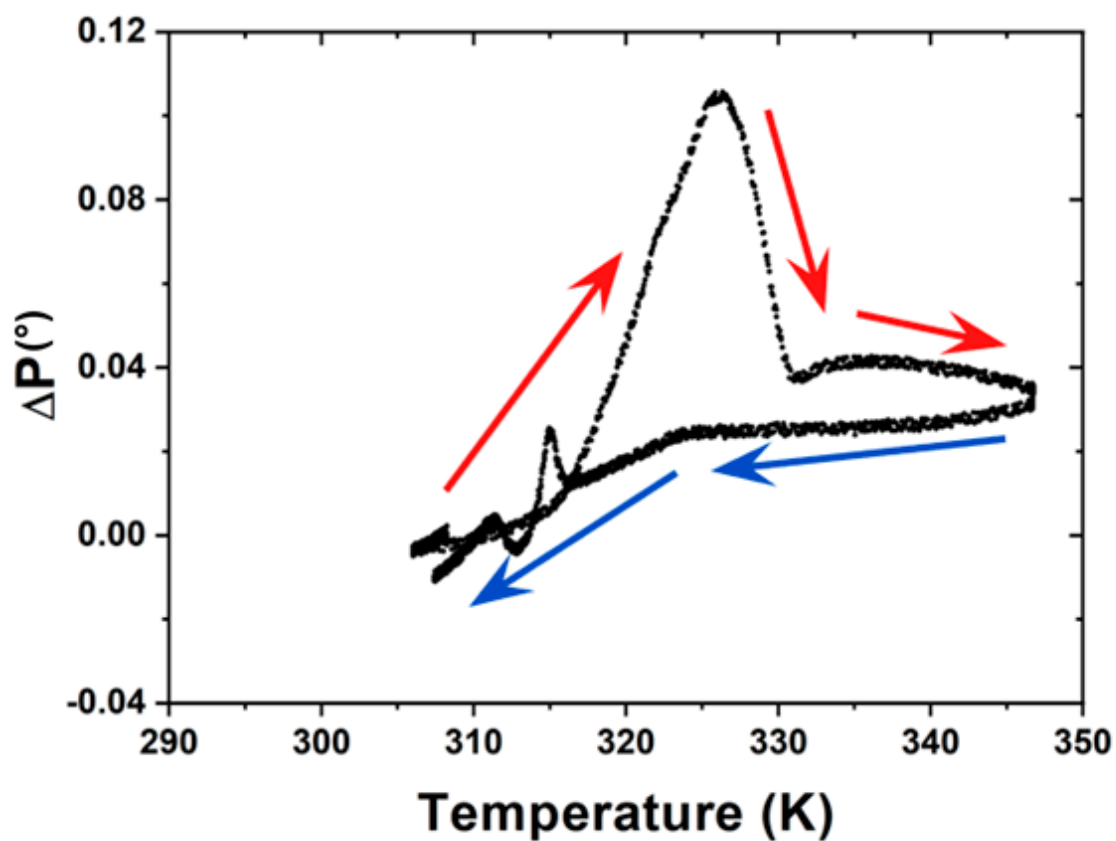

**Figure S9.** Temperature ramp  $\Delta P(^{\circ})$  vs.  $T(K)$  corresponding to sample H16 ramp number 7.

**Table S4.** Values for the temperatures of three different phase transitions obtained from 48 ellipsometric measurements on 8 different samples.

| Sample             | Ramp number | Temp (Gel-Ripple) | Temp (Ripple-Liquid Crystalline) | Temp (LC-Fluid Disordered) |
|--------------------|-------------|-------------------|----------------------------------|----------------------------|
| NE01               | 7           | 311.3             | 321.3                            | 329.9                      |
| NE01               | 8           | 310.9             | 321.1                            | 330.0                      |
| H14                | 3           | 311               | 321.3                            | 329.4                      |
| H14                | 6           | 312.4             | 323.9                            | 329.5                      |
| H15                | 5           | 310               | 323.4                            | 330.9                      |
| H15                | 6           | 311.4             | 325.6                            | 331.1                      |
| H16                | 6           | 312.8             | 326.6                            | 330,3                      |
| H16                | 7           | 312.3             | 327.3                            | 332.1                      |
| Average            |             | 311.5             | 323.8                            | 330.4                      |
| Standard deviation |             | 0.9               | 2.5                              | 0.9                        |

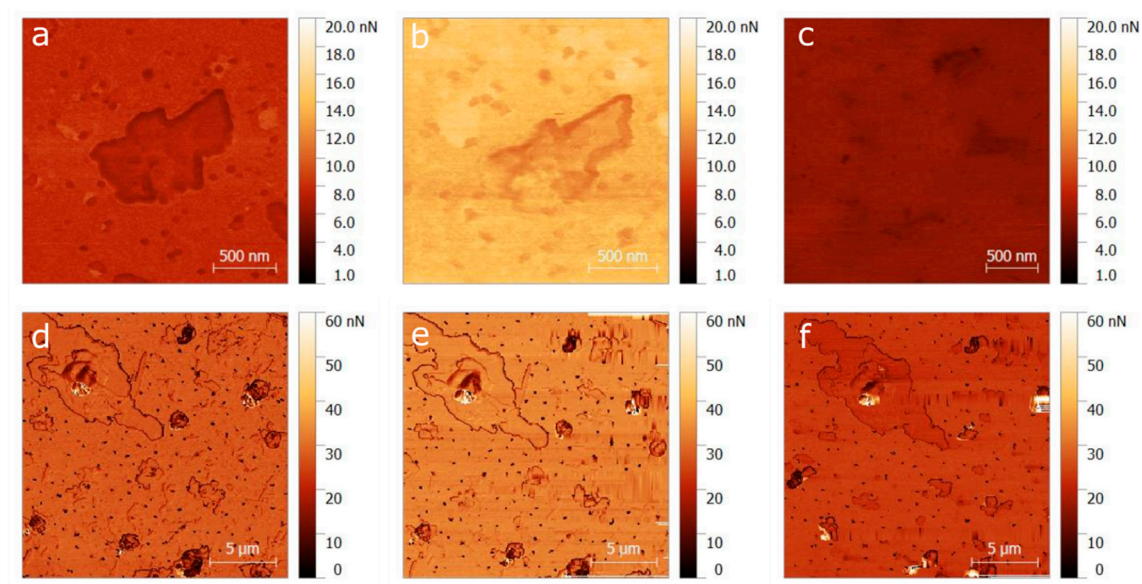

**Figure S10.** Adhesion maps obtained using QI™ mode for sample H14 (a) 296 K (b) 308 K and (c) 323 K and sample H15 (d) 296 K (e) 313 K and (f) 323 K.

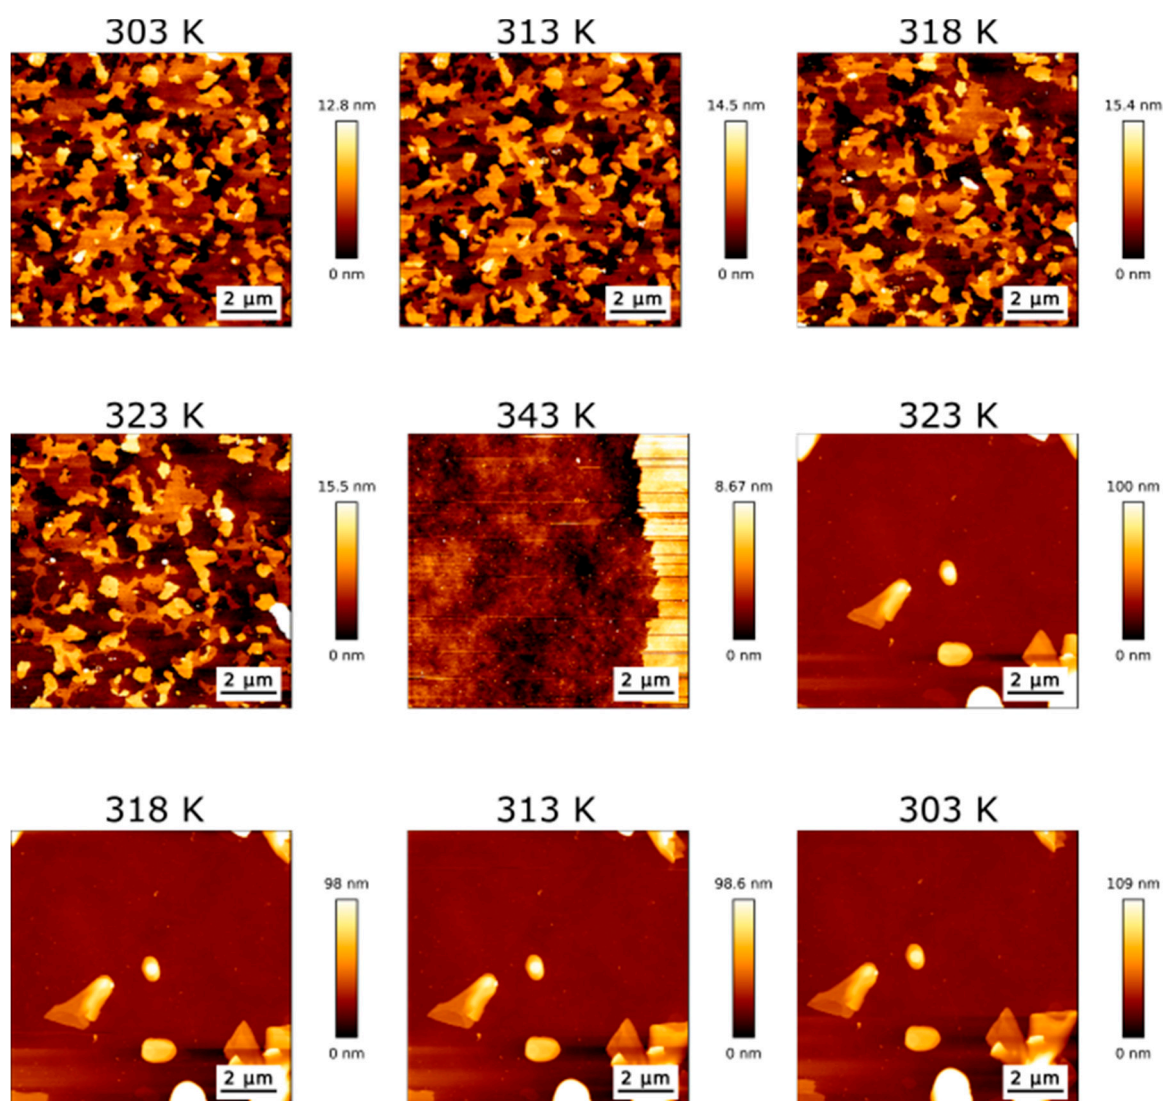

**Figure S11.** Topographical images of DPPC bilayer during the heating-cooling temperature cycle. At 343 K the SLB is in the fluid disordered phase and the AFM cantilever accumulates material at the right side of the image.

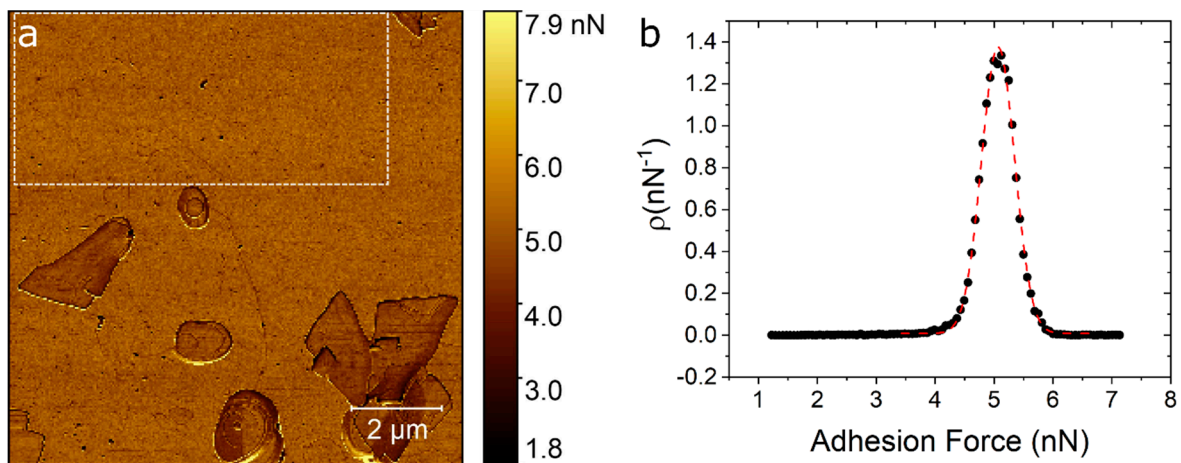

**Figure S12.** (a) Adhesion map of silicon at room temperature after a complete heating-cooling cycle corresponding to image figure 5 (e). In the marked area (white frame) the AFM-tip removed the SLB material on top of the  $\text{SiO}_2/\text{Si}$  substrate. (b) Histogram of the white rectangle shown in the adhesion map that represents the substrate, silicon. The main adhesion peak of silicon is around 5 nN.

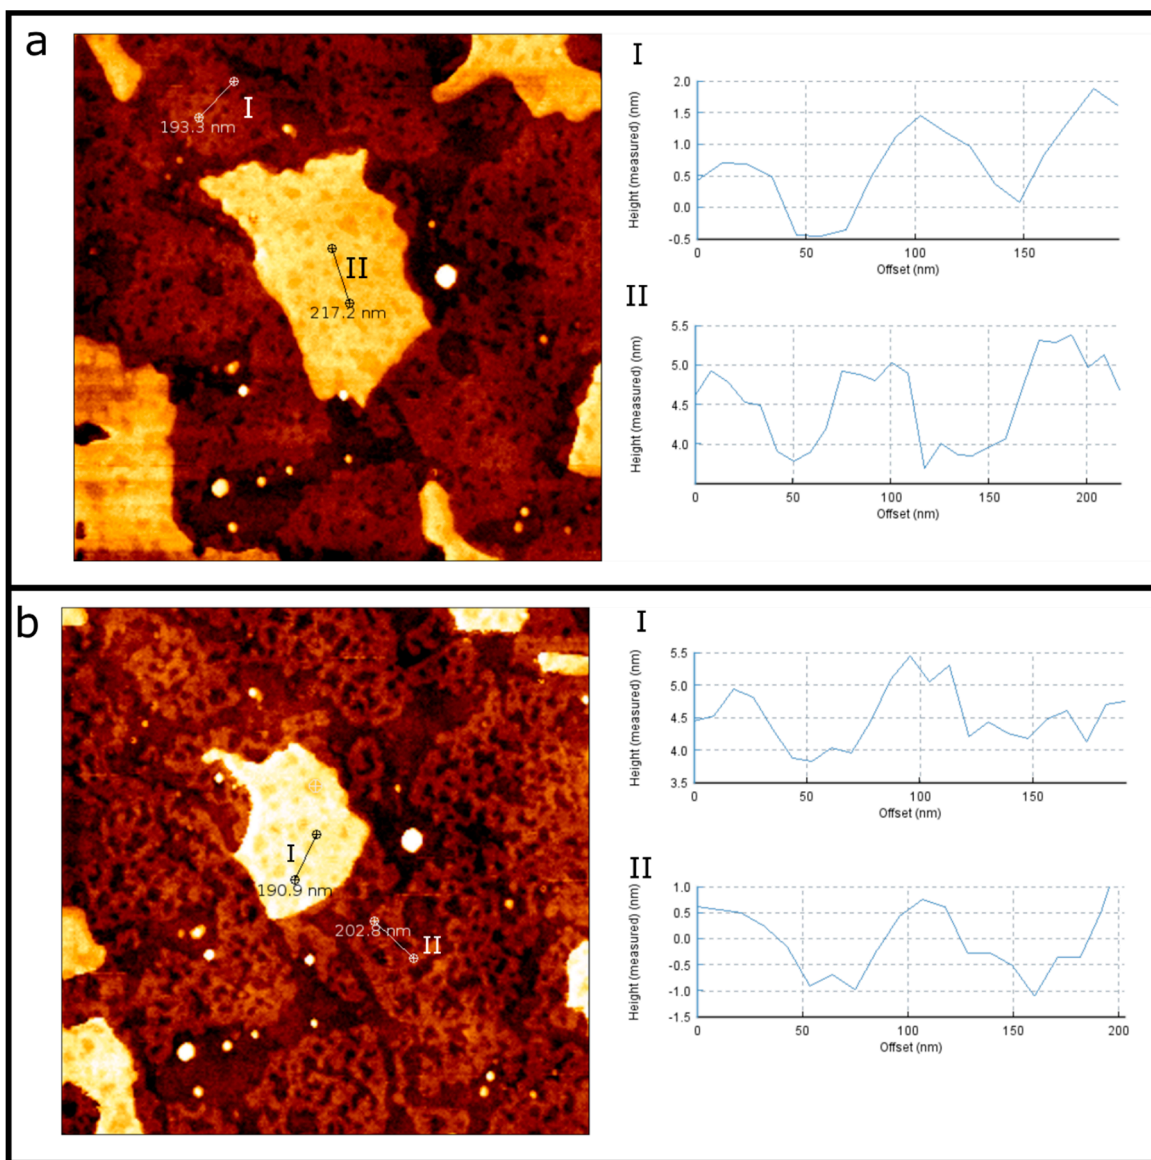

**Figure S13.** Topographical image and cross section of the image corresponding to (a) figure 6c and (b) figure 6f in the manuscript.



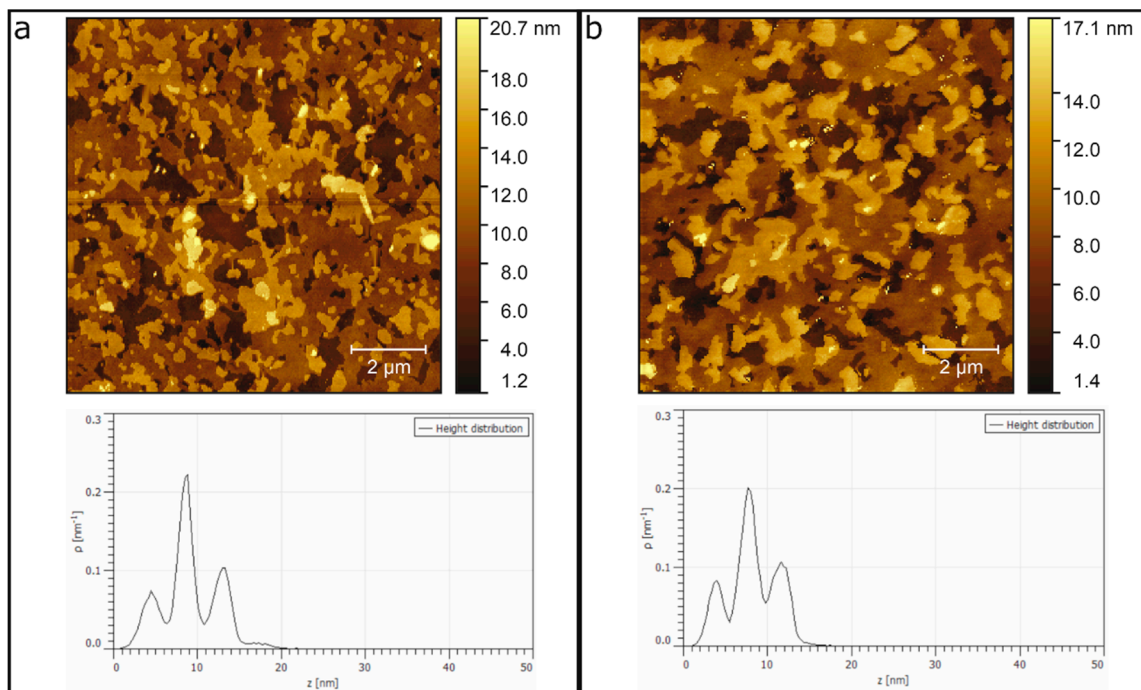

**Figure S14.** AFM images and histograms of (a) DPPC on SiO<sub>2</sub>/Si two hours after evaporation and (b) nine months later. The images were taken on the same sample at different areas. The sample was stored in air inside a Petri dish in the laboratory.
